# Supplementary material for: Dietary intake of one-carbon metabolism-related nutrients and hepatocellular carcinoma survival in the Guangdong Liver Cancer Cohort
Source: Royal Society of Chemistry journal article supplement (doi:10.1039/d2fo00943a), 2022-01-01
Supplement: d2fo00943a1.pdf [file d2fo00943a1.pdf]

# 1 **Supplementary Materials: Dietary intake of one-carbon metabolism-related nutrients and hepatocellular carcinoma** 2 **survival in the Guangdong Liver Cancer Cohort**

3  
4 **Tong-tong He,<sup>a</sup> Hongwei Xiao,<sup>b</sup> Maierhaba Wusiman,<sup>a</sup> Dinuerguli Yishake,<sup>a</sup> Ai-ping Fang,<sup>a</sup> Yan Luo,<sup>a</sup> Xiao-zhan Liu,<sup>a</sup> Zhao-yan Liu<sup>\*a</sup> and Hui-lian Zhu<sup>\*a</sup>**

5  
6 **Supplemental Table 1** Baseline Characteristics of Patients with Hepatocellular Carcinoma by Quartiles of Dietary Vitamin B2 Intake in the Guangdong Liver Cancer Cohort (N=905)

|                                             | Quartiles of Vitamin B2 Intake |                         |                         |                         | <i>P</i> <sub>value</sub> |
|---------------------------------------------|--------------------------------|-------------------------|-------------------------|-------------------------|---------------------------|
|                                             | Q1 (n=226)                     | Q2 (n=226)              | Q3 (n=226)              | Q4 (n=227)              |                           |
| Age (year) <sup>a</sup>                     | 50.8 (11.5)                    | 51.6 (12.3)             | 52.6 (11.7)             | 52.6 (12.2)             | 0.288                     |
| Sex, n (%)                                  |                                |                         |                         |                         | 0.022                     |
| Men                                         | 210 (92.5)                     | 196 (90.2)              | 205 (88.5)              | 192 (83.7)              |                           |
| Women                                       | 16 (7.5)                       | 30 (9.8)                | 21 (11.5)               | 35 (16.3)               |                           |
| Total energy intake (kcal/day) <sup>a</sup> | 2140.1 (1717.6, 2564.1)        | 1740.4 (1442.6, 2104.0) | 1766.8 (1419.8, 2211.2) | 2009.2 (1611.7, 2452.0) | <0.001                    |
| Methionine intake,mg/d <sup>a</sup>         | 1074.0 (925.2, 1241.1)         | 1234.9 (1146.2, 1394.2) | 1392.2 (1216.0, 1575.4) | 1539.2 (1304.3, 1812.9) | <0.001                    |
| Vitamin B2 intake,mg/d <sup>a</sup>         | 0.7 (0.6, 0.8)                 | 0.9 (0.9, 0.9)          | 1.0 (1.0, 1.1)          | 1.3 (1.2, 1.4)          | <0.001                    |
| Vitamin B3 intake, mg/d <sup>a</sup>        | 24.0 (21.1, 26.8)              | 25.1(22.6, 27.4)        | 26.3 (23.3, 28.5)       | 26.5 (23.8, 29.7)       | <0.001                    |
| Vitamin B6 intake, mg/d <sup>a</sup>        | 0.5 (0.4, 0.6)                 | 0.7 (0.6, 0.8)          | 0.8 (0.7, 0.9)          | 1.0 (0.8, 1.1)          | <0.001                    |
| Folate intake, μg/d <sup>a</sup>            | 138.8 (116.4, 166.7)           | 169.5 (149.1, 202.3)    | 187.0 (161.6, 221.4)    | 244.1 (195.0, 298.4)    | <0.001                    |
| Vitamin B12 intake, μg/d <sup>a</sup>       | 1.0 (0.5, 1.5)                 | 1.3 (1.0, 1.7)          | 1.5 (1.1, 2.3)          | 1.5 (1.0, 2.5)          | <0.001                    |
| BMI≥28 kg/m <sup>2</sup> , n (%)            | 11 (4.9)                       | 12 (5.3)                | 15 (6.6)                | 16 (7.0)                | 0.726                     |
| Residence, n (%)                            |                                |                         |                         |                         | <0.001                    |
| Urban                                       | 128 (56.6)                     | 159 (70.4)              | 159 (70.4)              | 173 (76.2)              |                           |
| Rural                                       | 98 (43.4)                      | 67 (29.6)               | 67 (29.6)               | 54 (23.8)               |                           |
| Education level, n (%)                      |                                |                         |                         |                         | <0.001                    |
| Primary school or below                     | 53 (23.5)                      | 44 (19.5)               | 38 (16.8)               | 46 (20.3)               |                           |

|                                          | Quartiles of Vitamin B2 Intake |                   |                   |                   | <i>P</i> value |
|------------------------------------------|--------------------------------|-------------------|-------------------|-------------------|----------------|
|                                          | Q1 (n=226)                     | Q2 (n=226)        | Q3 (n=226)        | Q4 (n=227)        |                |
| Secondary school                         | 146 (64.6)                     | 147 (65.0)        | 146 (64.6)        | 109 (48.0)        |                |
| College or above                         | 27 (11.9)                      | 35 (15.5)         | 42 (18.6)         | 72 (31.7)         |                |
| Smoking status, n (%)                    |                                |                   |                   |                   | 0.008          |
| Never smoker                             | 73 (32.3)                      | 93 (41.2)         | 88 (38.9)         | 109 (48.0)        |                |
| Former or Current smoker                 | 153 (67.7)                     | 133 (58.8)        | 138 (61.1)        | 118 (52.0)        |                |
| Alcohol drinking status, n (%)           |                                |                   |                   |                   | 0.108          |
| Never drinker                            | 128 (56.6)                     | 122 (54.0)        | 122 (54.0)        | 145 (63.9)        |                |
| Former or Current drinker                | 98 (43.4)                      | 104 (46.0)        | 104 (46.0)        | 82 (36.1)         |                |
| Physical activity (MET-h/d) <sup>a</sup> | 33.4 (27.0, 41.3)              | 28.7 (25.4, 35.8) | 28.7 (25.0, 35.1) | 28.6 (25.8, 34.6) | 0.001          |
| CRP level, n (%)                         |                                |                   |                   |                   | 0.065          |
| ≥3.0 mg/L                                | 107 (47.3)                     | 109 (48.2)        | 123 (54.4)        | 132 (58.1)        |                |
| >3.0 mg/L                                | 119 (52.7)                     | 117 (51.8)        | 103 (45.6)        | 95 (41.9)         |                |
| With family history of PLC, n (%)        | 33 (14.6)                      | 35 (15.5)         | 38 (16.8)         | 28 (12.3)         | 0.591          |
| With chronic diseases, n (%)             | 207 (91.6)                     | 204 (90.3)        | 209 (92.5)        | 209 (92.1)        | 0.846          |
| Cancer treatment, n (%)                  |                                |                   |                   |                   | 0.932          |
| Surgery                                  | 106 (46.9)                     | 108 (47.8)        | 117 (47.3)        | 113 (49.8)        |                |
| Other treatments                         | 120 (53.1)                     | 118 (52.2)        | 119 (52.7)        | 114 (50.2)        |                |
| BCLC stage, n (%)                        |                                |                   |                   |                   | 0.035          |
| 0                                        | 18 (8.0)                       | 22 (9.7)          | 22 (9.7)          | 34 (15.0)         |                |
| A                                        | 64 (28.3)                      | 62 (27.4)         | 80 (35.4)         | 83 (36.6)         |                |
| B                                        | 21 (9.3)                       | 23 (10.2)         | 23 (10.2)         | 21 (9.3)          |                |
| C                                        | 123 (54.4)                     | 119 (52.7)        | 101 (44.7)        | 89 (39.2)         |                |

7 Abbreviations: FLD, fatty liver disease; PLC, primary liver cancer; BCLC stage, Barcelona Clinic Liver Cancer stage.

8 <sup>a</sup> Values are mean ± SD or median (P25, P75), where appropriate.

9 **Supplemental Table 2** Baseline Characteristics of Patients with Hepatocellular Carcinoma by Quartiles of Dietary Vitamin B3 Intake in the Guangdong Liver Cancer Cohort (N=905)

|                                             | Quartiles of Vitamin B3 Intake |                         |                         |                         | <i>P</i> value |
|---------------------------------------------|--------------------------------|-------------------------|-------------------------|-------------------------|----------------|
|                                             | Q1 (n=226)                     | Q2 (n=227)              | Q3 (n=225)              | Q4 (n=227)              |                |
| Age (year) <sup>a</sup>                     | 53.5 (11.5)                    | 52.5 (12.0)             | 52.3 (12.5)             | 49.4 (11.5)             | 0.002          |
| Sex, n (%)                                  |                                |                         |                         |                         | 0.056          |
| Men                                         | 201 (88.9)                     | 191 (84.1)              | 202 (89.8)              | 209 (92.1)              |                |
| Women                                       | 25 (11.1)                      | 36 (15.9)               | 23 (10.2)               | 18 (7.9)                |                |
| Total energy intake (kcal/day) <sup>a</sup> | 2128.5 (1657.2, 2567.9)        | 1729.8 (1354.0, 2132.8) | 1799.4 (1523.3, 2144.6) | 2031.9 (1714.1, 2481.5) | <0.001         |
| Methionine intake, mg/d <sup>a</sup>        | 1098.7 (943.0, 1243.3)         | 1215.1 (1125.4, 1376.8) | 1339.1 (1217.6, 1500.9) | 1548.5 (1348.6, 1793.1) | <0.001         |
| Vitamin B2 intake, mg/d <sup>a</sup>        | 0.9 (0.7, 1.0)                 | 1.0 (0.8, 1.1)          | 1.0 (0.9, 1.1)          | 1.1 (0.9, 1.2)          | <0.001         |
| Vitamin B3 intake, mg/d <sup>a</sup>        | 20.9 (19.1, 21.8)              | 24.1 (23.4, 24.8)       | 26.7 (26.0, 27.3)       | 30.3 (29.0, 32.2)       | <0.001         |
| Vitamin B6 intake, mg/d <sup>a</sup>        | 0.6 (0.5, 0.8)                 | 0.7 (0.6, 0.9)          | 0.7 (0.6, 0.9)          | 0.8 (0.6, 1.0)          | <0.001         |
| Folate intake, µg/d <sup>a</sup>            | 169.2 (133.1, 215.3)           | 177.2 (147.3, 219.4)    | 183.0 (153.5, 221.0)    | 187.4 (149.1, 242.3)    | 0.026          |
| Vitamin B12 intake, µg/d <sup>a</sup>       | 1.5 (0.9, 2.3)                 | 1.3 (0.9, 2.0)          | 1.4 (1.1, 2.0)          | 1.2 (0.5, 1.8)          | 0.289          |
| BMI $\geq$ 28 kg/m <sup>2</sup> , n (%)     | 11 (4.9)                       | 12 (5.3)                | 14 (6.2)                | 17 (7.5)                | 0.651          |
| Residence, n (%)                            |                                |                         |                         |                         | 0.752          |
| Urban                                       | 160 (70.8)                     | 157 (69.2)              | 151 (67.1)              | 151 (66.5)              |                |
| Rural                                       | 66 (29.2)                      | 70 (30.8)               | 74 (32.9)               | 76 (33.5)               |                |
| Education level, n (%)                      |                                |                         |                         |                         | 0.219          |
| Primary school or below                     | 45 (19.8)                      | 45 (19.8)               | 53 (23.6)               | 38 (16.7)               |                |
| Secondary school                            | 144 (63.7)                     | 132 (58.1)              | 136 (60.4)              | 136 (59.9)              |                |
| College or above                            | 37 (16.4)                      | 50 (22.0)               | 36 (16.0)               | 53 (23.3)               |                |
| Smoking status, n (%)                       |                                |                         |                         |                         | 0.251          |
| Never smoker                                | 83 (36.7)                      | 99 (43.6)               | 83 (36.9)               | 98 (43.2)               |                |
| Former or Current smoker                    | 143 (63.3)                     | 128 (56.4)              | 142 (63.1)              | 129 (56.8)              |                |
| Alcohol drinking status, n (%)              |                                |                         |                         |                         | 0.092          |

|                                          | Quartiles of Vitamin B3 Intake |                   |                   |                   | <i>P</i> value |
|------------------------------------------|--------------------------------|-------------------|-------------------|-------------------|----------------|
|                                          | Q1 (n=226)                     | Q2 (n=227)        | Q3 (n=225)        | Q4 (n=227)        |                |
| Never drinker                            | 116 (51.3)                     | 142 (62.6)        | 133 (59.1)        | 126 (55.5)        |                |
| Former or Current drinker                | 110 (48.7)                     | 85 (37.4)         | 92 (40.9)         | 101 (44.5)        |                |
| Physical activity (MET-h/d) <sup>a</sup> | 29.7 (25.7, 39.1)              | 28.6 (25.0, 35.8) | 29.1 (25.6, 36.5) | 29.8 (26.3, 36.1) | 0.452          |
| CRP level, n (%)                         |                                |                   |                   |                   | 0.574          |
| ≥3.0 mg/L                                | 113 (50.0)                     | 120 (52.9)        | 112 (49.8)        | 126 (55.5)        |                |
| >3.0 mg/L                                | 113 (50.0)                     | 107 (47.1)        | 113 (50.2)        | 101 (44.5)        |                |
| With family history of PLC, n (%)        | 42 (18.6)                      | 30 (13.2)         | 25 (11.1)         | 37 (16.3)         | 0.119          |
| With chronic diseases, n (%)             | 208 (92.0)                     | 204 (89.9)        | 205 (91.1)        | 212 (93.4)        | 0.581          |
| Cancer treatment, n (%)                  |                                |                   |                   |                   | 0.055          |
| Surgery                                  | 99 (43.8)                      | 98 (43.2)         | 115 (51.1)        | 122 (53.7)        |                |
| Other treatments                         | 127 (56.2)                     | 129 (56.8)        | 110 (48.9)        | 105 (46.3)        |                |
| BCLC stage, n (%)                        |                                |                   |                   |                   | 0.804          |
| 0                                        | 23 (10.2)                      | 28 (12.3)         | 26 (11.6)         | 19 (8.4)          |                |
| A                                        | 72 (31.9)                      | 77 (33.9)         | 73 (32.4)         | 67 (29.5)         |                |
| B                                        | 25 (11.1)                      | 22 (9.7)          | 18 (8.0)          | 23 (10.1)         |                |
| C                                        | 106 (46.9)                     | 100 (44.1)        | 108 (48.0)        | 118 (52.0)        |                |

10 Abbreviations: FLD, fatty liver disease; PLC, primary liver cancer; BCLC stage, Barcelona Clinic Liver Cancer stage.

11 <sup>a</sup> Values are mean ± SD or median (P25, P75), where appropriate.

12 **Supplemental Table 3** Baseline Characteristics of Patients with Hepatocellular Carcinoma by Quartiles of Dietary Vitamin B6 Intake in the Guangdong Liver Cancer Cohort (N=905)

|                                           | Quartiles of Vitamin B6 Intake |                         |                         |                         | <i>P</i> value |
|-------------------------------------------|--------------------------------|-------------------------|-------------------------|-------------------------|----------------|
|                                           | Q1 (n=227)                     | Q2 (n=226)              | Q3 (n=226)              | Q4 (n=226)              |                |
| Age (year) <sup>a</sup>                   | 52.7 (11.8)                    | 51.3 (11.8)             | 53.0 (12.2)             | 50.8 (11.9)             | 0.143          |
| Sex, n (%)                                |                                |                         |                         |                         | 0.007          |
| Men                                       | 210 (92.5)                     | 208(92.0)               | 195 (86.3)              | 190 (84.1)              |                |
| Women                                     | 17 (7.5)                       | 18 (8.0)                | 31 (13.7)               | 36 (15.9)               |                |
| Total energy intake (kcal/d) <sup>a</sup> | 2089.7 (1715.2, 2603.2)        | 1740.7 (1407.3, 2131.9) | 1768.5 (1443.8, 2186.8) | 2030.8 (1663.9, 2454.6) | <0.001         |
| Methionine intake, mg/d <sup>a</sup>      | 1112.2 (954.7, 1255.8)         | 1246.1 (1121.7, 1380.2) | 1399.8 (1214.3, 1567.4) | 1553.2 (1248.7, 1820.4) | <0.001         |
| Vitamin B2 intake, mg/d <sup>a</sup>      | 0.8 (0.7, 0.9)                 | 0.9 (0.8, 1.0)          | 1.0 (0.9, 1.1)          | 1.2 (1.0, 1.3)          | <0.001         |
| Vitamin B3 intake, mg/d <sup>a</sup>      | 24.3 (21.7, 27.0)              | 24.9 (22.4, 27.4)       | 26.0 (23.1, 28.4)       | 26.4 (23.7, 30.0)       | <0.001         |
| Vitamin B6 intake, mg/d <sup>a</sup>      | 0.5 (0.4, 0.5)                 | 0.6 (0.6, 0.7)          | 0.8 (0.8, 0.8)          | 1.1 (1.0, 1.2)          | <0.001         |
| Folate intake, µg/d <sup>a</sup>          | 138.0 (115.7, 166.9)           | 169.6 (150.5, 201.1)    | 195.2 (168.6, 226.4)    | 241.2 (187.5, 296.8)    | <0.001         |
| Vitamin B12 intake, µg/d <sup>a</sup>     | 1.0 (0.5, 1.6)                 | 1.4 (0.9, 1.8)          | 1.5 (1.1, 2.2)          | 1.5 (1.0, 2.5)          | <0.001         |
| BMI≥28 kg m <sup>-2</sup> , n (%)         | 11 (4.8)                       | 12 (5.3)                | 15 (6.6)                | 16 (7.1)                | 0.714          |
| Residence, n (%)                          |                                |                         |                         |                         | <0.001         |
| Urban                                     | 128 (56.4)                     | 156 (69.0)              | 166 (73.5)              | 169 (74.8)              |                |
| Rural                                     | 99 (43.6)                      | 70 (31.0)               | 60 (26.5)               | 57 (25.2)               |                |
| Education level, n (%)                    |                                |                         |                         |                         | <0.001         |
| Primary school or below                   | 68 (30.0)                      | 44 (19.5)               | 47 (20.8)               | 22 (9.7)                |                |
| Secondary school                          | 136 (59.9)                     | 140 (61.9)              | 134 (59.3)              | 138 (61.1)              |                |
| College or above                          | 23 (10.1)                      | 42 (18.6)               | 45 (19.9)               | 66 (29.2)               |                |
| Smoking status, n (%)                     |                                |                         |                         |                         | <0.001         |
| Never smoker                              | 62 (27.3)                      | 88 (38.9)               | 98 (43.4)               | 115 (50.9)              |                |
| Former or Current smoker                  | 165 (72.7)                     | 138 (61.1)              | 128 (56.6)              | 111 (49.1)              |                |
| Alcohol drinking status, n (%)            |                                |                         |                         |                         | 0.452          |

|                                          | Quartiles of Vitamin B6 Intake |                   |                   |                   | <i>P</i> value |
|------------------------------------------|--------------------------------|-------------------|-------------------|-------------------|----------------|
|                                          | Q1 (n=227)                     | Q2 (n=226)        | Q3 (n=226)        | Q4 (n=226)        |                |
| Never drinker                            | 125 (55.1)                     | 129 (57.1)        | 124 (54.9)        | 139 (61.5)        |                |
| Former or Current drinker                | 102 (44.9)                     | 97 (42.9)         | 102 (45.1)        | 87 (38.5)         |                |
| Physical activity (MET-h/d) <sup>a</sup> | 31.2 (25.4, 40.5)              | 36.1 (30.3, 38.6) | 29.1 (25.8, 35.0) | 28.5 (25.4, 33.9) | <0.001         |
| CRP level, n (%)                         |                                |                   |                   |                   | 0.006          |
| ≥3.0 mg/L                                | 112 (49.3)                     | 99 (43.8)         | 128 (56.6)        | 132 (58.4)        |                |
| >3.0 mg/L                                | 115 (50.7)                     | 127 (56.2)        | 98 (43.4)         | 94 (41.6)         |                |
| With family history of PLC, n (%)        | 30 (13.2)                      | 33 (14.6)         | 37 (16.4)         | 34 (15.0)         | 0.823          |
| With chronic diseases, n (%)             | 208 (91.6)                     | 204 (90.3)        | 208 (92.0)        | 209 (92.5)        | 0.848          |
| Cancer treatment, n (%)                  |                                |                   |                   |                   | 0.290          |
| Surgery                                  | 106 (46.7)                     | 99 (43.8)         | 110 (48.7)        | 119 (52.7)        |                |
| Other treatments                         | 121 (53.3)                     | 127 (56.2)        | 116 (51.3)        | 107 (47.3)        |                |
| BCLC stage, n (%)                        |                                |                   |                   |                   | <0.001         |
| 0                                        | 19 (8.4)                       | 19 (8.4)          | 16 (7.1)          | 42 (18.6)         |                |
| A                                        | 60 (26.4)                      | 61 (27.0)         | 85 (37.6)         | 83 (36.7)         |                |
| B                                        | 22 (9.7)                       | 23 (10.2)         | 25 (11.1)         | 18 (8.0)          |                |
| C                                        | 126 (55.5)                     | 123 (54.4)        | 100 (44.2)        | 83 (36.7)         |                |

13 Abbreviations: FLD, fatty liver disease; PLC, primary liver cancer; BCLC stage, Barcelona Clinic Liver Cancer stage.

14 <sup>a</sup> Values are mean ± SD or median (P25, P75), where appropriate.

15 **Supplemental Table 4** Baseline Characteristics of Patients with Hepatocellular Carcinoma by Quartiles of Dietary Vitamin B12 Intake in the Guangdong Liver Cancer Cohort (N=905)

|                                           | Quartiles of Vitamin B12 Intake |                         |                         |                         | <i>P</i> value |
|-------------------------------------------|---------------------------------|-------------------------|-------------------------|-------------------------|----------------|
|                                           | Q1 (n=227)                      | Q2 (n=225)              | Q3 (n=226)              | Q4 (n=227)              |                |
| Age (year) <sup>a</sup>                   | 51.4 (11.4)                     | 52.3 (12.2)             | 52.2 (12.8)             | 51.9 (11.3)             | 0.858          |
| Sex, n (%)                                |                                 |                         |                         |                         | 0.014          |
| Men                                       | 204 (89.9)                      | 192 (85.3)              | 194 (85.8)              | 213 (93.8)              |                |
| Women                                     | 23 (10.1)                       | 33 (14.7)               | 32 (14.2)               | 14 (6.2)                |                |
| Total energy intake (kcal/d) <sup>a</sup> | 2318.3 (2007.1, 2647.7)         | 1774.1 (1532.5, 2113.6) | 1560.3 (1211.7, 1919.7) | 1933.9 (1586.8, 2503.7) | <0.001         |
| Methionine intake, mg/d <sup>a</sup>      | 1142.7 (977.7, 1298.8)          | 1245.0 (1112.9, 1397.9) | 1330.2 (1172.6, 1493.9) | 1597.7 (1262.6, 1859.9) | <0.001         |
| Vitamin B2 intake, mg/d <sup>a</sup>      | 0.9 (0.7, 1.1)                  | 0.9 (0.8, 1.1)          | 1.0 (0.9, 1.1)          | 0.9 (1.1, 1.2)          | <0.001         |
| Vitamin B3 intake, mg/d <sup>a</sup>      | 24.8 (21.2, 28.0)               | 25.3 (22.9, 27.6)       | 25.3 (23.3, 27.7)       | 25.8 (23.3, 29.0)       | 0.001          |
| Vitamin B6 intake, mg/d <sup>a</sup>      | 0.6 (0.4, 0.8)                  | 0.7 (0.6, 0.9)          | 0.7 (0.6, 0.9)          | 0.8 (0.6, 1.0)          | <0.001         |
| Folate intake, µg/d <sup>a</sup>          | 178.3 (138.0, 246.1)            | 182.6 (153.1, 224.2)    | 178.2 (146.7, 217.6)    | 177.7 (141.9, 221.0)    | <0.001         |
| Vitamin B12 intake, µg/d <sup>a</sup>     | 0.4 (0.1, 0.7)                  | 1.1 (1.0, 1.2)          | 1.6 (1.5, 1.8)          | 2.8 (2.3, 4.3)          | <0.001         |
| BMI≥28 kg/m <sup>2</sup> , n (%)          | 14 (6.2)                        | 8 (3.6)                 | 17 (7.5)                | 15 (6.6)                | 0.322          |
| Residence, n (%)                          |                                 |                         |                         |                         | 0.401          |
| Urban                                     | 146 (64.3)                      | 154 (68.4)              | 162 (71.7)              | 157 (69.2)              |                |
| Rural                                     | 81 (35.7)                       | 71 (31.6)               | 64 (28.3)               | 70 (30.8)               |                |
| Education level, n (%)                    |                                 |                         |                         |                         | 0.044          |
| Primary school or below                   | 45 (19.8)                       | 45 (20.0)               | 40 (17.7)               | 51 (22.5)               |                |
| Secondary school                          | 154 (67.8)                      | 127 (56.4)              | 136 (60.2)              | 131 (57.7)              |                |
| College or above                          | 28 (12.3)                       | 53 (23.6)               | 50 (22.1)               | 45 (19.8)               |                |
| Smoking status, n (%)                     |                                 |                         |                         |                         | 0.114          |
| Never smoker                              | 95 (41.9)                       | 99 (44.0)               | 93 (41.2)               | 76 (33.5)               |                |
| Former or Current smoker                  | 132 (58.1)                      | 126 (56.0)              | 133 (58.8)              | 151 (66.5)              |                |
| Alcohol drinking status, n (%)            |                                 |                         |                         |                         | 0.271          |

|                                          | Quartiles of Vitamin B12 Intake |                   |                   |                   | <i>P</i> value |
|------------------------------------------|---------------------------------|-------------------|-------------------|-------------------|----------------|
|                                          | Q1 (n=227)                      | Q2 (n=225)        | Q3 (n=226)        | Q4 (n=227)        |                |
| Never drinker                            | 135 (59.5)                      | 133 (59.1)        | 132 (58.4)        | 117 (51.5)        |                |
| Former or Current drinker                | 92 (40.5)                       | 92 (40.9)         | 94 (41.6)         | 110 (48.5)        |                |
| Physical activity (MET-h/d) <sup>a</sup> | 30.5 (26.4, 39.2)               | 30.8 (26.6, 38.3) | 28.1 (24.6, 34.2) | 28.6 (25.1, 35.2) | 0.030          |
| CRP level, n (%)                         |                                 |                   |                   |                   | 0.863          |
| ≥3.0 mg/L                                | 123 (54.2)                      | 113 (50.2)        | 118 (52.2)        | 117 (51.5)        |                |
| >3.0 mg/L                                | 104 (45.8)                      | 112 (49.8)        | 108 (47.8)        | 110 (48.5)        |                |
| With family history of PLC, n (%)        | 34 (15.0)                       | 40 (17.8)         | 33 (14.6)         | 27 (11.9)         | 0.374          |
| With chronic diseases, n (%)             | 206 (90.7)                      | 202 (89.8)        | 212 (93.8)        | 209 (92.1)        | 0.444          |
| Cancer treatment, n (%)                  |                                 |                   |                   |                   | 0.303          |
| Surgery                                  | 99 (43.6)                       | 118 (52.4)        | 110 (48.7)        | 107 (47.1)        |                |
| Other treatments                         | 128 (56.4)                      | 107 (47.6)        | 116 (51.3)        | 120 (52.9)        |                |
| BCLC stage, n (%)                        |                                 |                   |                   |                   | 0.895          |
| 0                                        | 26 (11.5)                       | 22 (9.8)          | 26 (11.5)         | 22 (9.7)          |                |
| A                                        | 68 (30.0)                       | 76 (33.8)         | 78 (34.5)         | 67 (29.5)         |                |
| B                                        | 26 (11.5)                       | 19 (8.4)          | 19 (8.4)          | 24 (10.6)         |                |
| C                                        | 107 (47.1)                      | 108 (48.0)        | 103 (45.6)        | 114 (50.2)        |                |

16 Abbreviations: FLD, fatty liver disease; PLC, primary liver cancer; BCLC stage, Barcelona Clinic Liver Cancer stage.

17 <sup>a</sup> Values are mean ± SD or median (P25, P75), where appropriate



**Supplemental Table 5** Baseline Characteristics of Patients with Hepatocellular Carcinoma by Quartiles of Dietary Folate Intake in the Guangdong Liver Cancer Cohort (N=905)

|                                           | Quartiles of Folate Intake |                         |                         |                         | <i>P</i> value |
|-------------------------------------------|----------------------------|-------------------------|-------------------------|-------------------------|----------------|
|                                           | Q1 (n=227)                 | Q2 (n=225)              | Q3 (n=226)              | Q4 (n=227)              |                |
| Age (year) <sup>a</sup>                   | 51.8 (12.0)                | 50.1 (11.9)             | 53.0 (11.6)             | 52.8 (12.1)             | 0.037          |
| Sex, n (%)                                |                            |                         |                         |                         | 0.023          |
| Men                                       | 210 (92.5)                 | 203 (90.2)              | 200 (88.5)              | 190 (83.7)              |                |
| Women                                     | 17 (7.5)                   | 22 (9.8)                | 26 (11.5)               | 37 (16.3)               |                |
| Total energy intake (kcal/d) <sup>a</sup> | 2089.7 (1629.0, 2562.8)    | 1723.7 (1409.9, 2091.4) | 1848.8 (1532.1, 2120.7) | 2015.0 (1668.2, 2382.9) | <0.001         |
| Methionine intake, mg/d <sup>a</sup>      | 1154.0 (980.8, 1436.9)     | 1290.7 (1147.8, 1472.5) | 1302.7 (1156.4, 1512.6) | 1353.1 (1183.1, 1611.2) | <0.001         |
| Vitamin B2 intake, mg/d <sup>a</sup>      | 0.8 (0.7, 0.9)             | 0.9 (0.8, 1.0)          | 1.0 (0.9, 1.1)          | 1.2 (1.0, 1.4)          | <0.001         |
| Vitamin B3 intake, mg/d <sup>a</sup>      | 24.9 (21.7, 27.9)          | 25.2 (22.9, 27.5)       | 25.5 (23.0, 27.9)       | 26.0 (23.1, 29.0)       | 0.316          |
| Vitamin B6 intake, mg/d <sup>a</sup>      | 0.5 (0.4, 0.7)             | 0.7 (0.6, 0.8)          | 0.8 (0.6, 0.9)          | 1.0 (0.8, 1.1)          | <0.001         |
| Folate intake, µg/d <sup>a</sup>          | 124.5 (103.8, 135.2)       | 163.5 (155.1, 169.8)    | 197.8 (188.7, 211.2)    | 268.7 (244.0, 315.4)    | <0.001         |
| Vitamin B12 intake, µg/d <sup>a</sup>     | 1.3 (0.8, 2.1)             | 1.4 (1.0, 2.1)          | 1.4 (1.0, 2.1)          | 1.2 (0.7, 1.9)          | 0.268          |
| BMI≥28 kg/m <sup>2</sup> , n (%)          | 14 (6.2)                   | 12 (5.3)                | 17 (7.5)                | 11 (4.8)                | 0.646          |
| Residence, n (%)                          |                            |                         |                         |                         | 0.059          |
| Urban                                     | 142 (62.6)                 | 149 (66.2)              | 164 (72.6)              | 164 (72.2)              |                |
| Rural                                     | 85 (37.4)                  | 76 (33.8)               | 62 (27.4)               | 63 (27.8)               |                |
| Education level, n (%)                    |                            |                         |                         |                         | <0.001         |
| Primary school or below                   | 56 (22.9)                  | 43 (19.6)               | 49 (18.9)               | 33 (18.6)               |                |
| Secondary school                          | 148 (65.2)                 | 145 (64.4)              | 123 (54.4)              | 132 (58.1)              |                |
| College or above                          | 23 (10.1)                  | 37 (16.4)               | 54 (23.9)               | 62 (27.3)               |                |
| Smoking status, n (%)                     |                            |                         |                         |                         | <0.001         |
| Never smoker                              | 73 (32.2)                  | 79 (35.1)               | 97 (42.9)               | 114 (40.1)              |                |
| Former or Current smoker                  | 154 (67.8)                 | 146 (64.9)              | 129 (57.1)              | 113 (59.9)              |                |
| Alcohol drinking status, n (%)            |                            |                         |                         |                         | 0.775          |
| Never drinker                             | 124 (54.6)                 | 128 (56.9)              | 130 (57.5)              | 135 (59.5)              |                |
| Former or Current drinker                 | 103 (45.4)                 | 97 (43.1)               | 96 (42.5)               | 92 (40.5)               |                |
| Physical activity (MET h/d) <sup>a</sup>  | 29.6 (25.2, 39.5)          | 29.8 (25.9, 37.4)       | 28.9 (25.2, 36.2)       | 29.0 (25.9, 35.0)       | 0.333          |
| CRP level, n (%)                          |                            |                         |                         |                         | 0.179          |
| ≥3.0 mg/L                                 | 110 (48.5)                 | 113 (50.2)              | 116 (51.3)              | 134 (58.1)              |                |

|                                   | Quartiles of Folate Intake |            |            |            | <i>P</i> value |
|-----------------------------------|----------------------------|------------|------------|------------|----------------|
|                                   | Q1 (n=227)                 | Q2 (n=225) | Q3 (n=226) | Q4 (n=227) |                |
| >3.0 mg/L                         | 117 (51.5)                 | 112 (49.8) | 110 (48.7) | 92 (41.9)  |                |
| With family history of PLC, n (%) | 37 (16.3)                  | 24 (10.7)  | 38 (16.8)  | 35 (15.4)  | 0.236          |
| With chronic diseases, n (%)      | 215 (94.7)                 | 200 (88.9) | 203 (89.8) | 211 (93.0) | 0.091          |
| Cancer treatment, n (%)           |                            |            |            |            | 0.100          |
| Surgery                           | 111 (48.9)                 | 92 (40.9)  | 115 (50.9) | 116 (51.1) |                |
| Other treatments                  | 116 (51.1)                 | 133 (59.1) | 111 (49.1) | 111 (48.9) |                |
| BCLC stage, n (%)                 |                            |            |            |            | 0.022          |
| 0                                 | 18 (7.9)                   | 22 (9.8)   | 22 (9.8)   | 34 (15.0)  |                |
| A                                 | 61 (26.9)                  | 64 (28.4)  | 83 (36.7)  | 81 (35.7)  |                |
| B                                 | 23 (10.1)                  | 25 (11.1)  | 17 (7.5)   | 23 (10.1)  |                |
| C                                 | 125 (55.1)                 | 114 (50.7) | 104 (46.0) | 89 (39.2)  |                |

Abbreviations: FLD, fatty liver disease; PLC, primary liver cancer; BCLC stage, Barcelona Clinic Liver Cancer stage.

<sup>a</sup> Values are mean  $\pm$  SD or median (P25, 25, P75), where appropriate.

**Supplemental Table 6** Top five contributors of food sources (percentage contribution to total intake) of one-carbon metabolism related nutrients among HCC patients

| Nutrient    | Food source                  | Proportion (%) |
|-------------|------------------------------|----------------|
| Methionine  | Grains and their products    | 44.1           |
|             | Pork loin cooked             | 22.4           |
|             | Sea fish                     | 4.9            |
|             | Eggs                         | 3.7            |
|             | Poultry                      | 3.3            |
| Vitamin B2  | Grains and their products    | 32.3           |
|             | Vegetables                   | 20.8           |
|             | Pork loin cooked             | 16.2           |
|             | Fruits                       | 5.0            |
|             | Eggs                         | 3.9            |
| Vitamin B3  | Grains and their products    | 56.5           |
|             | Pork loin cooked             | 17.5           |
|             | Vegetables                   | 7.6            |
|             | Fruits                       | 2.6            |
|             | Poultry                      | 2.6            |
| Vitamin B6  | Vegetables                   | 32.6           |
|             | Pork loin cooked             | 20.0           |
|             | Fruits                       | 13.8           |
|             | Grains and their products    | 9.2            |
|             | Poultry                      | 7.9            |
| Vitamin B12 | Pork loin cooked             | 61.5           |
|             | Sea fish                     | 17.8           |
|             | Processed meat and vegetable | 8.8            |
|             | Grains and their products    | 2.6            |
|             | Shrimps                      | 1.2            |
| Folate      | Vegetables                   | 37.8           |
|             | Grains and their products    | 27.1           |
|             | Soys and products            | 8.8            |
|             | Fruits                       | 8.4            |
|             | Eggs                         | 5.1            |

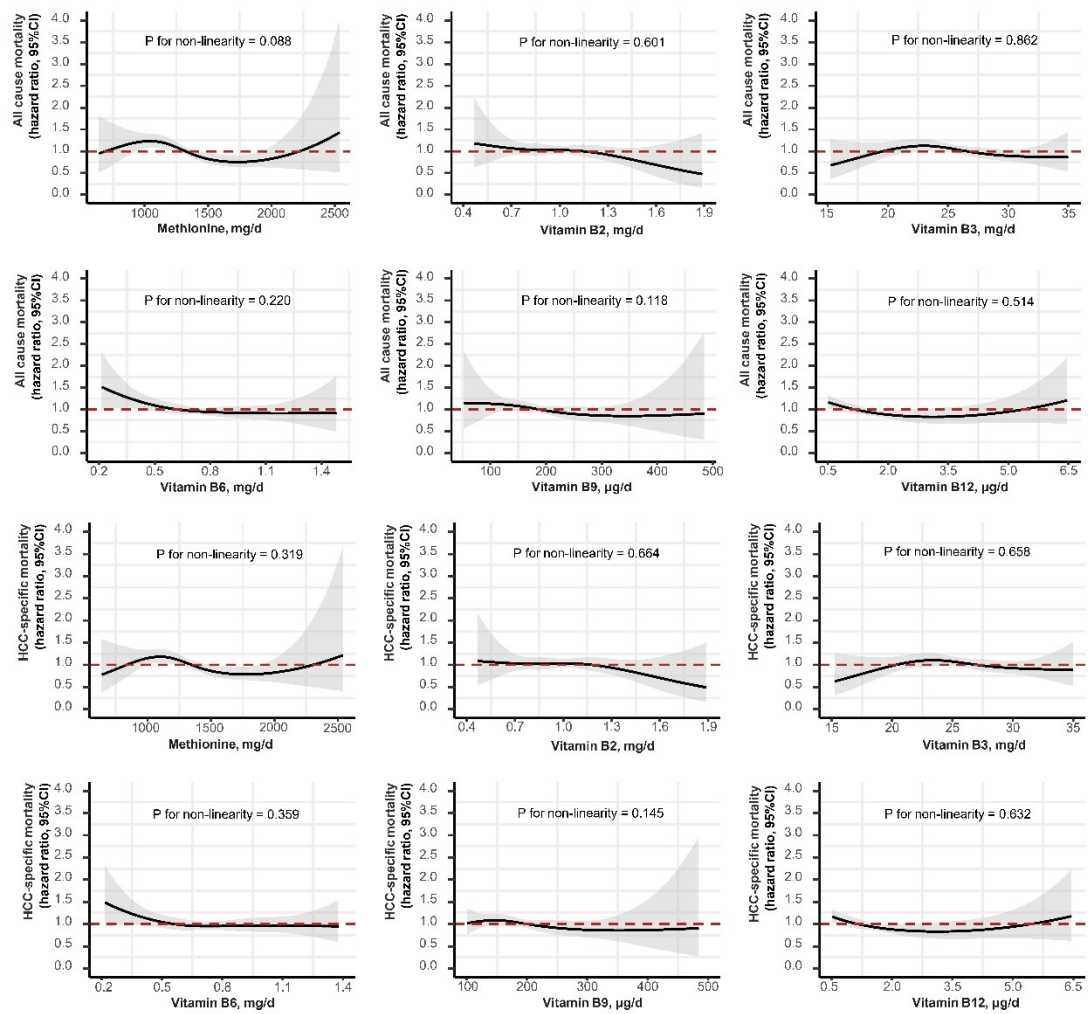

**Supplemental Figure 1** Multivariable adjusted hazard ratios for all cause mortality and HCC-specific mortality according to dietary intake of one-carbon metabolism-related nutrients on a continuous scale. Solid black lines are multivariable adjusted hazard ratios, with shaded area showing 95% confidence intervals derived from restricted cubic spline regressions with three knots. Reference lines for no association are indicated by the dashed red lines at a hazard ratio of 1.0. Analyses were adjusted for sex, age, body mass index, energy intake, physical activity, education level, smoking status, alcohol drinking status, presence of chronic diseases, Barcelona Clinic Liver Cancer stage and treatment.
